# Supplementary material
Source: publisher site journal article supplement (https://www.dovepress.com/article/556918)
Supplement: Supplementary file 1 [file 556918%20_supplemental%20files_.docx]

**Table of abbreviations (sorted in alphabetical order)**

| **Abbreviation** | **Full term** |
| --- | --- |
| ADR | adverse drug reaction |
| AE | adverse effects |
| BCPNN | Bayesian Confidence Propagation Neural Network |
| CI | confidence interval |
| DME | Designated Medical Event |
| FAERS | FDA Adverse Event Reporting System |
| FDA | Food and Drug Administration |
| GI | gastrointestinal |
| GIP | glucose-dependent insulinotropic polypeptide |
| GLP-1 | glucagon-like peptide-1 |
| HbA1c | hemoglobin A1c |
| IME | Important Medical Event |
| IQR | interquartile range |
| MedDRA | Medical Dictionary for Regulatory Activities |
| MGPS | Multi-item Gamma Poisson Shrinker |
| PRR | Proportional Reporting Ratio |
| PS | primary suspect |
| PT | preferred term |
| ROR | Reporting Odds Ratio |
| SOC | system organ class |
| TTO | time to onset |
| WHO | World Health Organization |

**Table S1** The fourfold matrix

|  | **tirzepatide** | **non-tirzepatide** | **total** |
| --- | --- | --- | --- |
| Target AEs | a | c | a + c |
| Non-target AEs | b | d | b + d |
| total | a + b | c + d | N = a + b + c + d |

**Notes**: a, number of reports containing both the target drug and the target adverse event;

b, number of reports containing other adverse events of the target drug;

c, number of reports containing the target adverse event of other drugs;

d, number of reports containing other drugs and other adverse events.

**Table S2** ROR, PRR, BCPNN, and MGPS methods, formulas, and thresholds

| **Method** | **Formula** | **Threshold** |
| --- | --- | --- |
| ROR | ROR = = | a 3 and  95%CI (lower limit) > 1 |
| SE(ln(ROR)) = |
|  |
| PRR | PRR = | a 3 and  PRR 2  and 4 |
| SE(ln(PRR)) = |
|  |
|  |
| BCPNN |  | IC025 > 0 |
|  |
| MGPS |  | EBGM05 > 2 |
|  |

**Abbreviation**: ROR, Reporting Odds Ratio; SE, standard error; CI, confidence interval; PRR, Proportional Reporting Ratio; BCPNN, Bayesian Confidence Propagation Neural Network; IC, information component; MGPS, Multi-item Gamma Poisson Shrinkage; EBGM, Empirical Bayesian Geometric Mean.

**
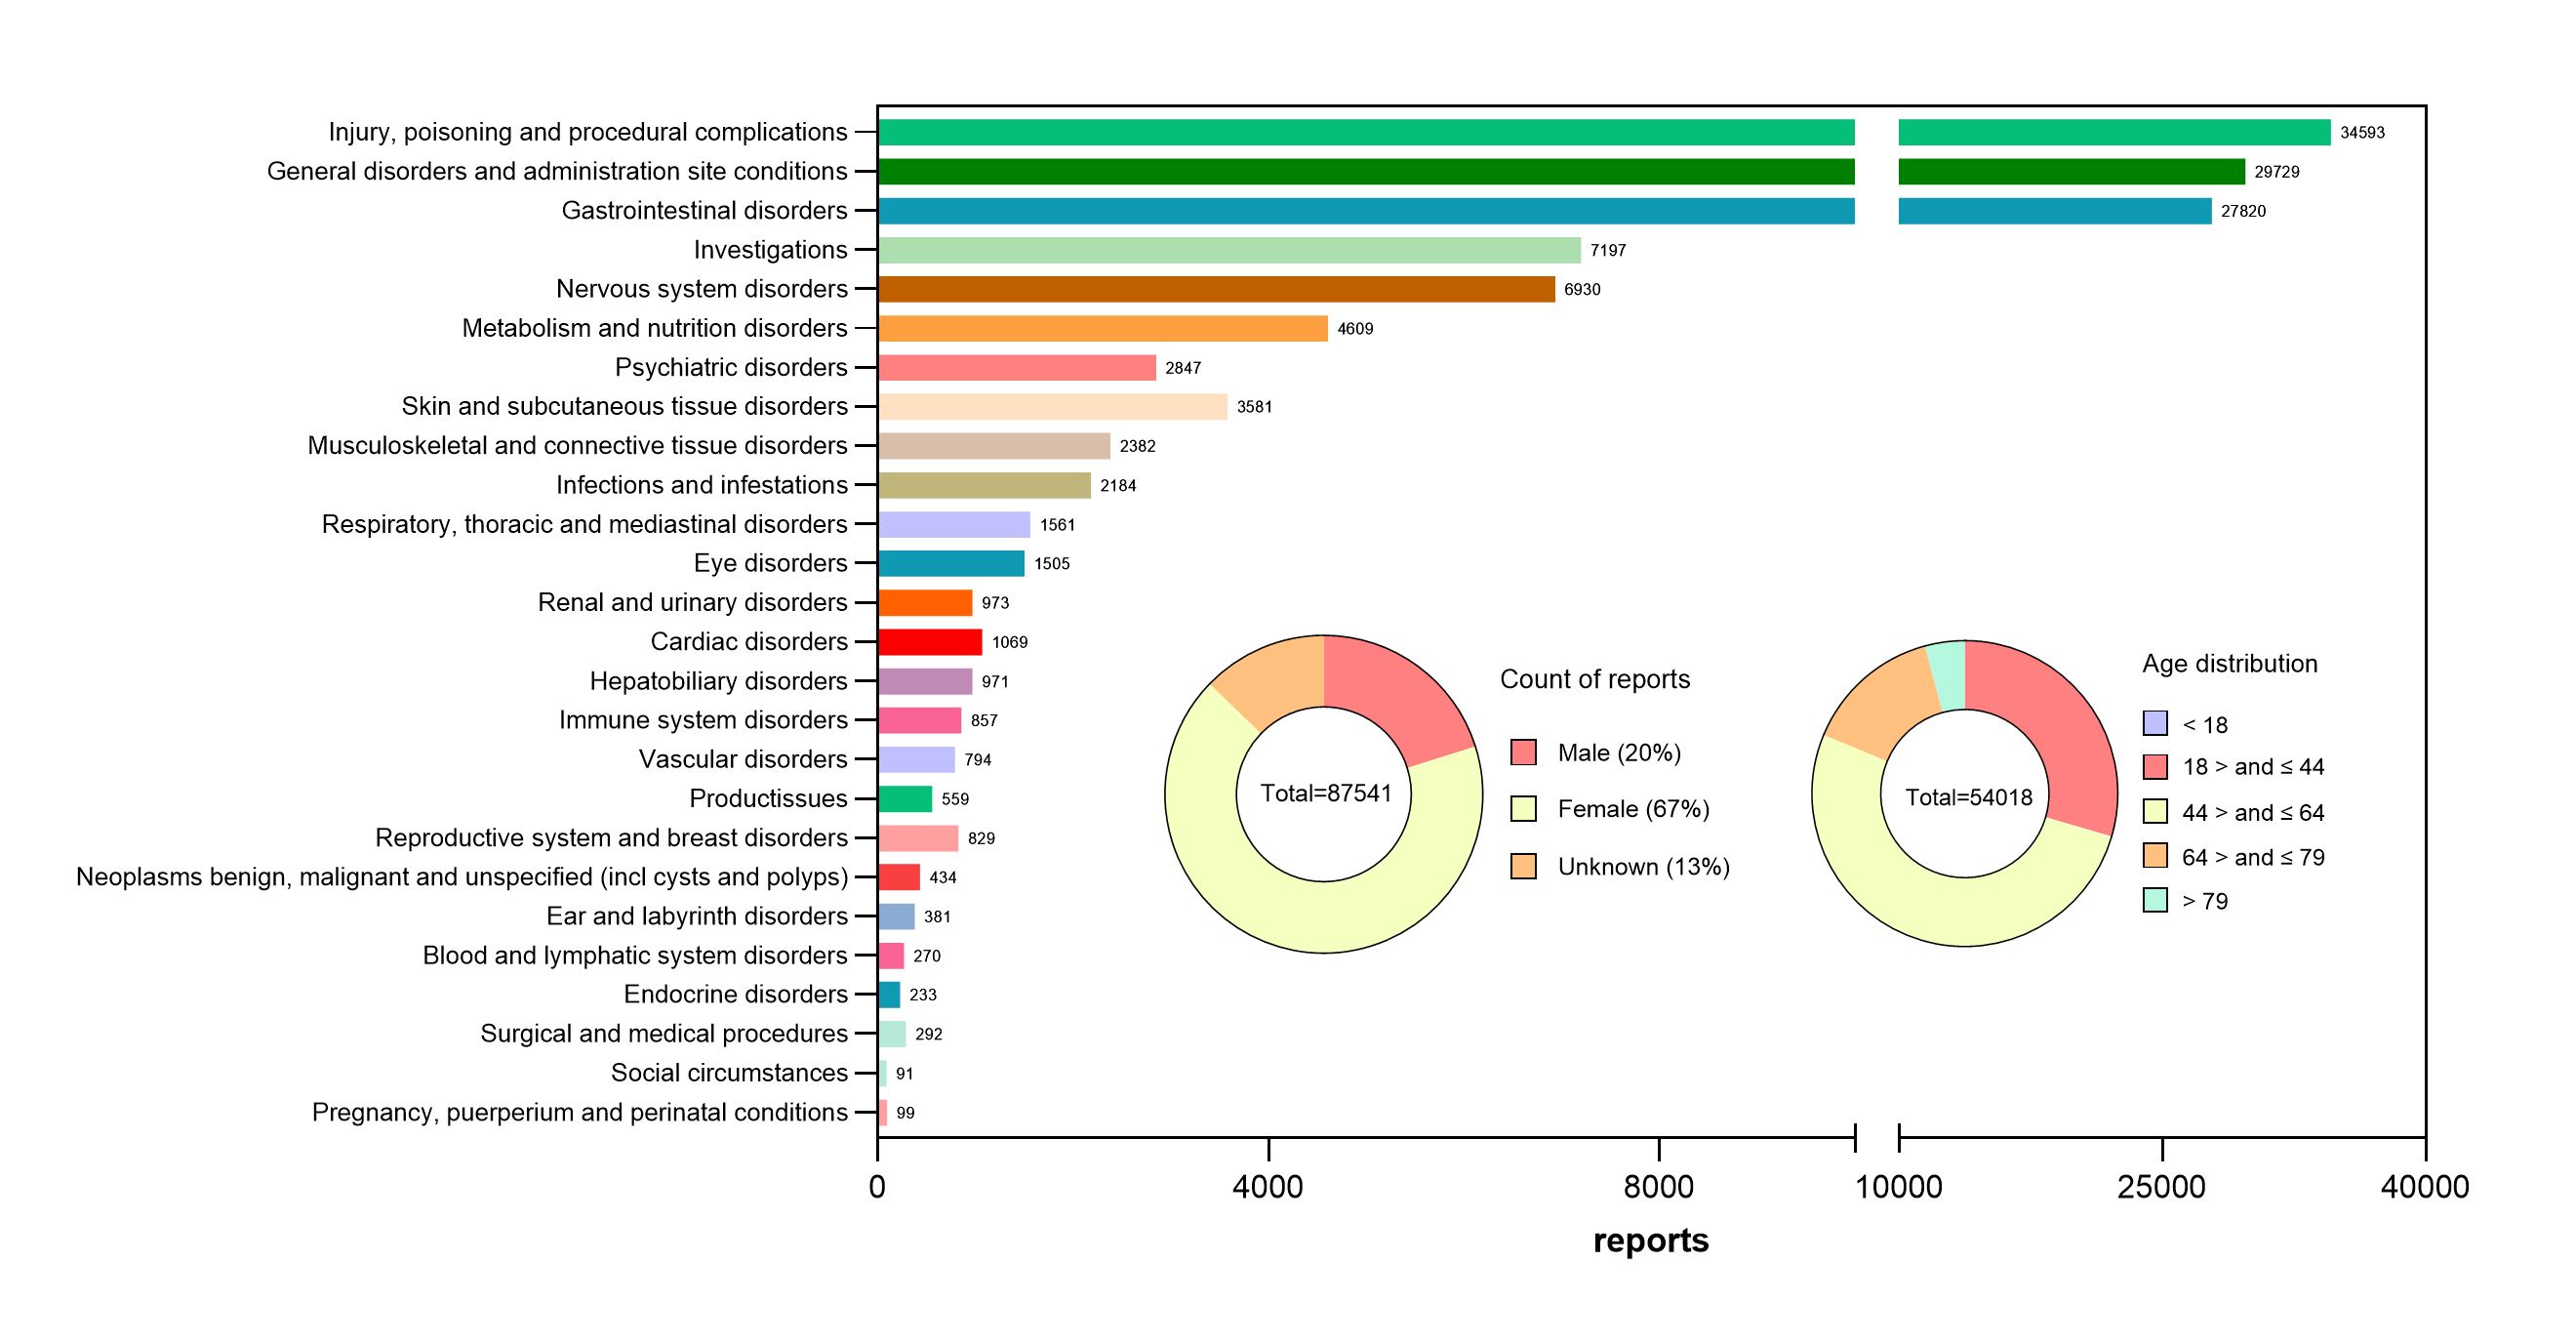
**

**Figure S1**. Adverse effects (AEs) distribution at system organ class (SOC) level and by gender/age obtained from WHO vigilance on 20250706.


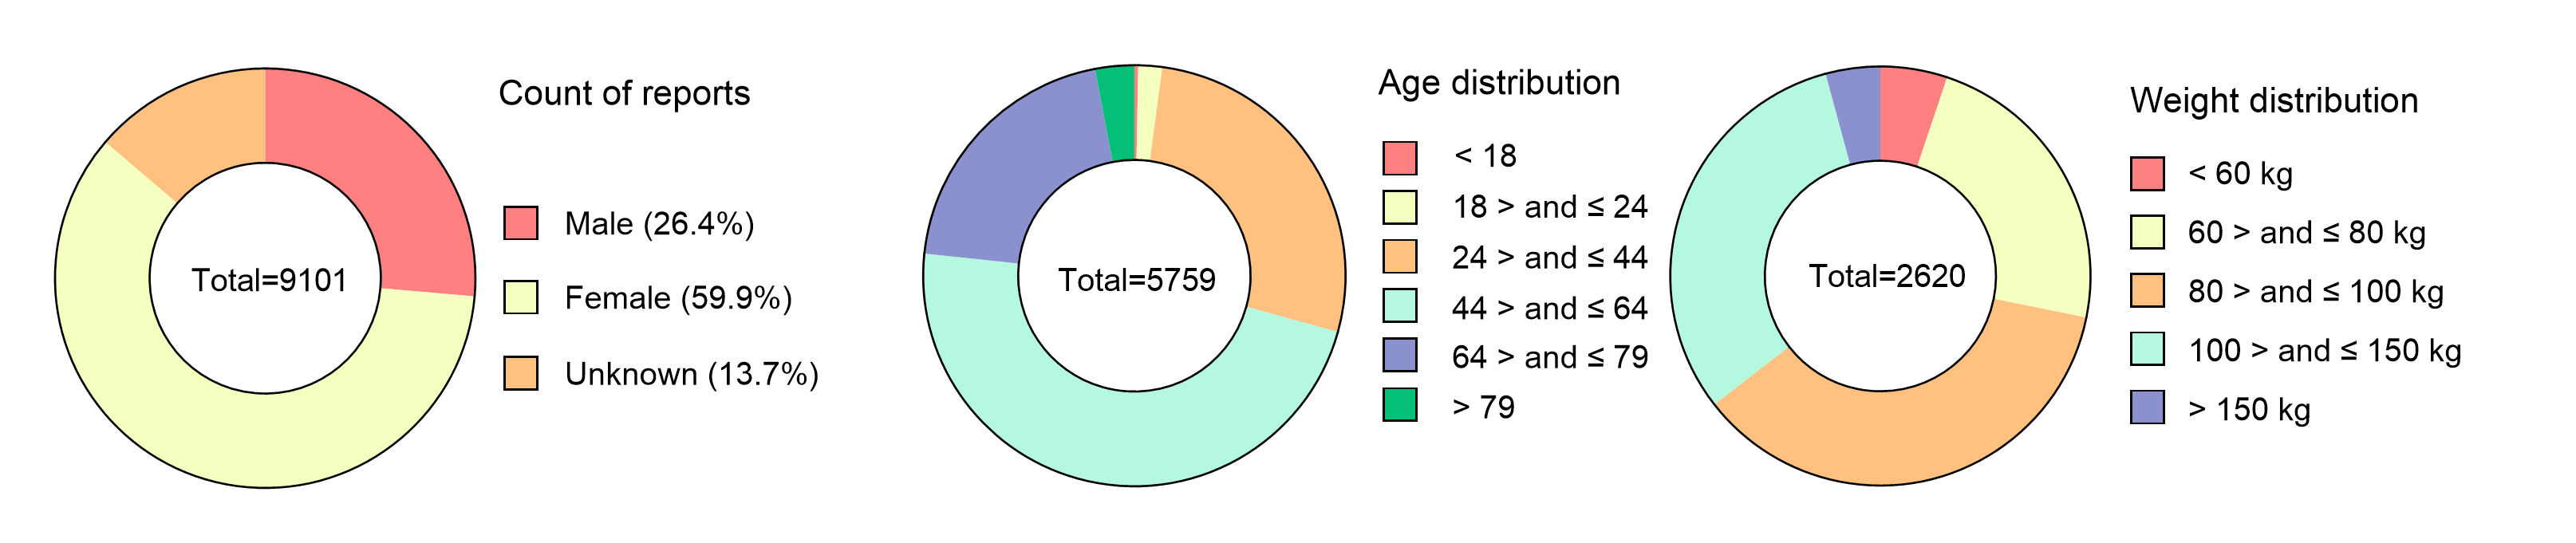


**Figure S2** The demographic analysis of adverse effect signals of tirzepatide associated with serious outcomes.

**Table S3** Signal strength of all AEs of tirzepatide at SOC level

| **SOC** | **Reports** | **ROR**  **(95%CI)** | **PRR(χ2)** | **IC(IC025)** | **EBGM(EBGM05)** |
| --- | --- | --- | --- | --- | --- |
| Injury, poisoning and procedural complications | 39065 | 2.63(2.59-2.66) | 2.16 (27758.48) | 1.1 (1.09) | 2.15 (2.12) |
| General disorders and administration site conditions | 34930 | 1.62(1.60-1.64) | 1.46 (6129.82) | 0.54 (0.53) | 1.46 (1.44) |
| Gastrointestinal disorders | 26395 | 2.66(2.63-2.70) | 2.34 (21767.45) | 1.21 (1.19) | 2.32 (2.29) |
| Investigations | 7056 | 0.81(0.79-0.83) | 0.82 (295.93) | -0.28 (-0.32) | 0.82 (0.8) |
| Nervous system disorders | 4973 | 0.49(0.48-0.50) | 0.51 (2527.74) | -0.97 (-1.01) | 0.51 (0.5) |
| Metabolism and nutrition disorders | 4551 | 1.77(1.72-1.82) | 1.74 (1451.32) | 0.79 (0.75) | 1.73 (1.68) |
| Psychiatric disorders | 2876 | 0.43(0.41-0.44) | 0.44 (2153.69) | -1.18 (-1.24) | 0.44 (0.43) |
| Skin and subcutaneous tissue disorders | 2779 | 0.37(0.36-0.39) | 0.39 (2862.51) | -1.37 (-1.42) | 0.39 (0.37) |
| Musculoskeletal and connective tissue disorders | 2318 | 0.29(0.28-0.30) | 0.3 (3947.77) | -1.72 (-1.78) | 0.3 (0.29) |
| Infections and infestations | 1996 | 0.21(0.20-0.22) | 0.22 (5742.35) | -2.15 (-2.22) | 0.22 (0.22) |
| Respiratory, thoracic and mediastinal disorders | 1448 | 0.21(0.20-0.23) | 0.22 (4106.86) | -2.16 (-2.23) | 0.22 (0.21) |
| Eye disorders | 1394 | 0.51(0.48-0.54) | 0.51 (652.2) | -0.96 (-1.03) | 0.52 (0.49) |
| Renal and urinary disorders | 889 | 0.41(0.38-0.44) | 0.41 (754.89) | -1.27 (-1.37) | 0.41 (0.39) |
| Cardiac disorders | 789 | 0.32(0.30-0.35) | 0.33 (1115.94) | -1.61 (-1.71) | 0.33 (0.31) |
| Hepatobiliary disorders | 725 | 0.64(0.59-0.69) | 0.64 (147.95) | -0.64 (-0.75) | 0.64 (0.6) |
| Immune system disorders | 711 | 0.45(0.41-0.48) | 0.45 (484.11) | -1.15 (-1.26) | 0.45 (0.42) |
| Vascular disorders | 601 | 0.23(0.21-0.25) | 0.23 (1552.45) | -2.1 (-2.21) | 0.23 (0.22) |
| Product issues | 515 | 0.19(0.17-0.20) | 0.19 (1831.17) | -2.4 (-2.52) | 0.19 (0.17) |
| Reproductive system and breast disorders | 492 | 0.65(0.59-0.71) | 0.65 (93.67) | -0.62 (-0.75) | 0.65 (0.6) |
| Neoplasms benign, malignant and unspecified (incl cysts and polyps) | 327 | 0.09(0.08-0.10) | 0.09 (2944.22) | -3.41 (-3.56) | 0.09 (0.08) |
| Ear and labyrinth disorders | 298 | 0.51(0.46-0.57) | 0.51 (137.1) | -0.96 (-1.12) | 0.52 (0.46) |
| Blood and lymphatic system disorders | 206 | 0.09(0.08-0.10) | 0.09 (1969.71) | -3.49 (-3.69) | 0.09 (0.08) |
| Endocrine disorders | 166 | 0.42(0.36-0.49) | 0.42 (133.88) | -1.25 (-1.47) | 0.42 (0.36) |
| Surgical and medical procedures | 124 | 0.06(0.05-0.07) | 0.06 (1928.6) | -4.1 (-4.35) | 0.06 (0.05) |
| Social circumstances | 70 | 0.11(0.08-0.13) | 0.11 (532.54) | -3.23 (-3.56) | 0.11 (0.08) |
| Pregnancy, puerperium and perinatal conditions | 47 | 0.12(0.09-0.16) | 0.12 (308.18) | -3.07 (-3.46) | 0.12 (0.09) |

**Abbreviation**: SOC, system organ class; ROR, reporting odds ratio; CI, confidence interval; PRR, proportional reporting ratio; χ2, chi-squared; IC, information component; IC025, the lower limit of 95% CI of the IC; EBGM, empirical Bayesian geometric mean; EBGM05, the lower limit of 95% CI of EBGM.

**Table S4** Clinical prioritization of AE signals of tirzepatide (n > 30)

| **SOC** | **PT** | **Reports**  **(n)** | **ROR**  **(95%CI)** | **Death**  **(n)** | **DME**  **/IMEa** | **Relevance evaluation** | **Priority Level (score)** |
| --- | --- | --- | --- | --- | --- | --- | --- |
| Endocrine disorders | thyroid mass | 50 | 4.39(3.31-5.82) | 0 | 0 | ++ | weak(4) |
| Gastrointestinal disorders | pancreatitis | 583 | 8.00(7.36-8.70) | 10 | 2 | ++ | strong(8) |
| impaired gastric emptying | 459 | 16.38(14.87-18.05) | 3 | 1 | ++ | moderate(7) |
| pancreatitis acute | 92 | 2.58(2.10-3.18) | 2 | 2 | ++ | moderate(7) |
| eructation | 1153 | 40.29(37.73-43.03) | 1 | 0 | ++ | moderate(6) |
| flatulence | 626 | 5.53(5.10-5.99) | 0 | 0 | ++ | moderate(6) |
| small intestinal obstruction | 68 | 2.91(5.53-9.00) | 0 | 1 | ++ | moderate(6) |
| gastrointestinal sounds abnormal | 66 | 5.46(4.27-6.98) | 0 | 0 | ++ | moderate(6) |
| ileus | 66 | 3.20(2.51-4.09) | 0 | 1 | ++ | moderate(6) |
| vomiting projectile | 51 | 10.70(8.04-14.22) | 1 | 0 | ++ | moderate(6) |
| nausea | 6855 | 4.76(4.65-4.88) | 13 | 0 | ++ | moderate(5) |
| diarrhoea | 3459 | 2.34(2.26-2.42) | 15 | 0 | ++ | moderate(5) |
| vomiting | 2926 | 3.33(3.21-3.46) | 17 | 0 | ++ | moderate(5) |
| constipation | 2141 | 4.31(4.13-4.50) | 4 | 0 | ++ | moderate(5) |
| abdominal pain upper | 1344 | 3.19(3.02-3.36) | 2 | 0 | ++ | moderate(5) |
| abdominal discomfort | 943 | 2.33(2.18-2.48) | 2 | 0 | ++ | moderate(5) |
| dyspepsia | 914 | 4.68(4.38-5.00) | 1 | 0 | ++ | moderate(5) |
| gastrointestinal disorder | 640 | 2.69(12.74-14.99) | 4 | 0 | ++ | moderate(5) |
| abdominal distension | 600 | 2.71(2.50-2.94) | 2 | 0 | ++ | moderate(5) |
| gastrooesophageal reflux disease | 511 | 3.21(2.94-3.50) | 0 | 0 | ++ | moderate(5) |
| food poisoning | 53 | 3.13(11.83-20.89) | 0 | 0 | ++ | moderate(5) |
| General disorders and administration site conditions | injection site pain | 8436 | 14.54(14.21-14.88) | 0 | 0 | ++ | moderate(6) |
| injection site haemorrhage | 3492 | 23.84(22.99-24.72) | 0 | 0 | ++ | moderate(6) |
| injection site erythema | 2924 | 17.39(16.73-18.08) | 0 | 0 | ++ | moderate(6) |
| injection site bruising | 1914 | 14.21(13.55-14.90) | 0 | 0 | ++ | moderate(6) |
| injection site pruritus | 1490 | 14.78(14.01-15.60) | 0 | 0 | ++ | moderate(6) |
| injection site mass | 1048 | 12.76(11.97-13.59) | 0 | 0 | ++ | moderate(6) |
| injection site swelling | 881 | 6.20(5.79-6.63) | 0 | 0 | ++ | moderate(6) |
| injection site injury | 873 | 87.95(80.79-95.75) | 0 | 0 | ++ | moderate(6) |
| injection site rash | 839 | 15.36(14.30-16.50) | 0 | 0 | ++ | moderate(6) |
| hunger | 751 | 30.75(28.41-33.29) | 0 | 0 | ++ | moderate(6) |
| injection site reaction | 731 | 7.40(6.87-7.98) | 0 | 0 | ++ | moderate(6) |
| injury associated with device | 654 | 13.12(12.11-14.22) | 0 | 0 | ++ | moderate(6) |
| injection site urticaria | 640 | 13.82(2.49-2.91) | 0 | 0 | ++ | moderate(6) |
| injection site irritation | 265 | 16.82(14.80-19.11) | 0 | 0 | ++ | moderate(6) |
| injection site discomfort | 227 | 9.05(7.91-10.35) | 0 | 0 | ++ | moderate(6) |
| injection site hypersensitivity | 197 | 30.39(26.04-35.46) | 0 | 0 | ++ | moderate(6) |
| injection site warmth | 179 | 7.81(6.72-9.08) | 0 | 0 | ++ | moderate(6) |
| injection site coldness | 169 | 146.11(117.7-181.39) | 0 | 0 | ++ | moderate(6) |
| injection site vesicles | 120 | 9.14(7.60-10.99) | 0 | 0 | ++ | moderate(6) |
| injection site paraesthesia | 109 | 31.86(25.87-39.24) | 0 | 0 | ++ | moderate(6) |
| injection site inflammation | 75 | 7.56(5.99-9.53) | 0 | 0 | ++ | moderate(6) |
| injection site discolouration | 91 | 4.38(3.56-5.40) | 0 | 0 | ++ | moderate(5) |
| injection site induration | 77 | 4.65(3.70-5.83) | 0 | 0 | ++ | moderate(5) |
| injection site indentation | 40 | 6.94(5.05-9.54) | 0 | 0 | ++ | moderate(5) |
| injection site scar | 37 | 6.37(4.58-8.85) | 0 | 0 | ++ | moderate(5) |
| injection site hypoaesthesia | 35 | 10.27(7.28-14.48) | 0 | 0 | ++ | moderate(5) |
| Hepatobiliary disorders | cholecystitis | 69 | 3.48(2.74-4.42) | 1 | 1 | + | moderate(5) |
| cholelithiasis | 186 | 3.57(3.08-4.13) | 3 | 0 | + | weak(4) |
| gallbladder disorder | 109 | 4.19(3.47-5.07) | 0 | 0 | + | weak(4) |
| biliary colic | 36 | 5.68(4.07-7.93) | 0 | 0 | + | weak(4) |
| Injury, poisoning and procedural complications | incorrect dose administered | 17262 | 39.13(38.45-39.83) | 0 | 0 | ++ | moderate(6) |
| extra dose administered | 4742 | 64.73(62.52-67.02) | 1 | 0 | ++ | moderate(6) |
| accidental underdose | 2725 | 97.37(92.70-102.27) | 0 | 0 | ++ | moderate(6) |
| accidental overdose | 1005 | 20.51(19.20-21.92) | 0 | 0 | ++ | moderate(6) |
| product administered at inappropriate site | 753 | 14.58(13.52-15.72) | 0 | 0 | ++ | moderate(6) |
| wrong patient received product | 67 | 8.36(6.53-10.70) | 0 | 0 | ++ | moderate(6) |
| intercepted product dispensing error | 53 | 15.72(2.38-4.11) | 0 | 0 | ++ | moderate(6) |
| Investigations | blood glucose increased | 1664 | 6.70(6.38-7.04) | 0 | 0 | ++ | moderate(6) |
| blood glucose decreased | 596 | 10.21(9.39-11.10) | 1 | 0 | ++ | moderate(6) |
| glycosylated haemoglobin increased | 387 | 8.21(7.41-9.10) | 2 | 0 | ++ | moderate(6) |
| blood glucose abnormal | 190 | 5.69(4.92-6.58) | 0 | 0 | ++ | moderate(6) |
| blood glucose fluctuation | 78 | 5.24(4.18-6.57) | 0 | 0 | ++ | moderate(6) |
| lipase increased | 110 | 9.87(8.13-11.98) | 0 | 0 | + | moderate(5) |
| glycosylated haemoglobin decreased | 39 | 10.72(7.74-14.84) | 0 | 0 | ++ | moderate(5) |
| glycosylated haemoglobin abnormal | 32 | 7.52(5.27-10.73) | 0 | 0 | ++ | moderate(5) |
| amylase increased | 40 | 5.10(3.72-7.00) | 0 | 0 | + | weak(4) |
| Metabolism and nutrition disorders | feeding disorder | 359 | 6.73(6.05-7.49) | 1 | 0 | ++ | moderate(6) |
| hypoglycaemia | 340 | 5.32(4.78-5.93) | 4 | 0 | ++ | moderate(6) |
| food craving | 192 | 20.50(17.61-23.85) | 0 | 0 | ++ | moderate(6) |
| fluid intake reduced | 68 | 7.05(2.29-3.70) | 0 | 0 | ++ | moderate(6) |
| decreased appetite | 1527 | 2.87(2.73-3.02) | 12 | 0 | ++ | moderate(5) |
| dehydration | 707 | 3.13(2.91-3.37) | 10 | 0 | ++ | moderate(5) |
| increased appetite | 456 | 12.73(11.56-14.01) | 0 | 0 | + | moderate(5) |
| hypophagia | 145 | 3.04(2.58-3.59) | 4 | 0 | ++ | moderate(5) |
| diabetic ketoacidosis | 90 | 2.53(2.05-3.12) | 3 | 1 | + | moderate(5) |
| ketoacidosis | 45 | 4.35(12.99-24.17) | 0 | 1 | + | weak(4) |
| Musculoskeletal and connective tissue disorders | muscle atrophy | 77 | 2.98(2.38-3.74) | 0 | 0 | - | weak(3) |
| Nervous system disorders | allodynia | 45 | 17.72(3.23-5.85) | 0 | 0 | - | weak(3) |
| Product issues | product tampering | 414 | 150.19(130.68-172.61) | 1 | 0 | ++ | moderate(6) |
| Psychiatric disorders | panic attack | 148 | 2.47(2.10-2.90) | 0 | 0 | - | weak(3) |
| sleep disorder due to general medical condition, insomnia type | 120 | 4.00(3.34-4.80) | 0 | 0 | - | weak(3) |
| Reproductive system and breast disorders | postmenopausal haemorrhage | 46 | 9.92(7.35-13.38) | 0 | 1 | - | weak(4) |
| menstrual disorder | 37 | 2.85(2.06-3.94) | 0 | 0 | - | weak(2) |
| Skin and subcutaneous tissue disorders | sensitive skin | 99 | 4.35(3.56-5.32) | 0 | 0 | ++ | moderate(5) |

**Notes**: a, 0 means not grouped into DME or IME, 1 means IME, 2 means DME.

**Abbreviation**: SOC, system organ class; PT, preferred term; ROR, reporting odds ratio; 95%CI, 95% confidence interval; DME, Designated Medical Event; IME, Important Medical Event.

**Table S5** Stability test of the modified Weibull distributed method applied in this study

| **TTO (days)** | | | **Weibull distribution** | | | |
| --- | --- | --- | --- | --- | --- | --- |
| **stability test** |  |  | **Scale parameter** | | **Shape parameter** | |
| **Median (IQR)** | **Min-Max** | **α** | **95%CI** | **β** | **95%CI** |
| 1 | 6.36 (0.85-31.2) | 0-736 | 14.75 | 13.56-15.94 | 0.44 | 0.42-0.45 |
| 2 | 6.43 (0.86-31.33) | 0-736 | 14.86 | 13.66-16.05 | 0.44 | 0.43-0.45 |
| 3 | 6.33 (0.84-31.14) | 0-736 | 14.7 | 13.51-15.89 | 0.43 | 0.42-0.45 |
| 4 | 6.35 (0.84-31.2) | 0-736 | 14.73 | 13.54-15.92 | 0.44 | 0.42-0.45 |
| 5 | 6.32 (0.84-31.12) | 0-736 | 14.68 | 13.49-15.87 | 0.43 | 0.43-0.45 |
| 6 | 6.36 (0.85-31.2) | 0-736 | 14.74 | 13.55-15.94 | 0.44 | 0.42-0.45 |
| STD | 0.0387 |  | 0.0628 |  | 0.0052 |  |
| average | 6.36 |  | 14.74 |  | 0.44 |  |
| **Coefficient of Variation** | 0.61% |  | 0.43% |  | 1.2% |  |

**Abbreviation:** TTO, time to onset; IQR, interquartile range; CI, confidence interval; STD, standard deviation.

**Notes:** Coefficient of Variation**,** indicators used to measure the degree of data dispersion. The smaller the value, the more stable the method is.

**Table S6** Time to onset analysis of tirzepatide-related cases

| **TTO (days)** | | | **Weibull distribution** | | | | **Failure type** |
| --- | --- | --- | --- | --- | --- | --- | --- |
| **cases** | | | **Scale parameter** | | **Shape parameter** | |
| **n** | **Median (IQR)** | **Min-Max** | **α** | **95%CI** | **β** | **95%CI** |
| 3485 | 6.36 (0.85-31.2) | 0-736 | 14.75 | 13.56-15.94 | 0.44 | 0.42-0.45 | early failure |

**Abbreviation**: TTO, time to onset; IQR, interquartile range; CI, confidence interval.

**Table S7** Tirzepatide-related AEs that led to serious outcomes (occurrence proportion > 50%)

| **SOC** | **PT** | **AEs with serious outcomes** | **Total AEs** | **ROR**  **(95%CI)** | **EBGM**  **(EBGM05)** |
| --- | --- | --- | --- | --- | --- |
| Eye disorders | optic ischaemic neuropathy | 18(100.0%) | 18 | 3.81(2.38-6.08) | 3.73(2.34) |
| diabetic retinopathy | 15(55.6%) | 27 | 5.72(3.89-8.41) | 5.53(3.77) |
| Gastrointestinal disorders | pancreatitis | 581(99.7%) | 583 | 8.00(7.36-8.70) | 7.59(6.98) |
| impaired gastric emptying | 285(62.1%) | 459 | 16.38(14.87-18.05) | 14.71(13.35) |
| pancreatitis acute | 91(98.9%) | 92 | 2.58(2.10-3.18) | 2.55(2.08) |
| small intestinal obstruction | 68(100.0%) | 68 | 2.91(2.29-3.70) | 2.87(2.26) |
| ileus | 62(93.9%) | 66 | 3.20(2.51-4.09) | 3.15(2.47) |
| vomiting projectile | 29(56.9%) | 51 | 10.70(8.04-14.22) | 10.00(7.52) |
| ileus paralytic | 21(100.0%) | 21 | 3.14(2.04-4.85) | 3.10(2.01) |
| pancreatitis necrotising | 17(100.0%) | 17 | 3.35(2.07-5.42) | 3.29(2.04) |
| obstructive pancreatitis | 13(100.0%) | 13 | 6.42(3.68-11.19) | 6.17(3.54) |
| gastrointestinal hypomotility | 7(58.3%) | 12 | 5.10(2.87-9.08) | 4.96(2.79) |
| Hepatobiliary disorders | cholelithiasis | 135(72.6%) | 186 | 3.57(3.08-4.13) | 3.50(3.03) |
| gallbladder disorder | 63(57.8%) | 109 | 4.19(3.47-5.07) | 4.10(3.39) |
| cholecystitis | 58(84.1%) | 69 | 3.48(2.74-4.42) | 3.42(2.69) |
| biliary colic | 29(80.6%) | 36 | 5.68(4.07-7.93) | 5.49(3.94) |
| cholecystitis acute | 26(100.0%) | 26 | 3.05(2.07-4.50) | 3.01(2.04) |
| cholangitis acute | 8(100.0%) | 8 | 4.89(2.42-9.90) | 4.76(2.35) |
| Investigations | blood ketone body increased | 7(100.0%) | 7 | 6.08(2.85-12.97) | 5.87(2.75) |
| Metabolism and nutrition disorders | dehydration | 442(62.5%) | 70 | 3.13(2.91-3.37) | 3.07(2.85) |
| diabetic ketoacidosis | 89(98.9%) | 90 | 2.53(2.05-3.12) | 2.50(2.03) |
| ketoacidosis | 45(100.0%) | 45 | 4.35(3.23-5.85) | 4.25(3.16) |
| fluid intake reduced | 38(55.9%) | 68 | 7.05(5.53-9.00) | 6.75(5.29) |
| starvation ketoacidosis | 21(100.0%) | 21 | 50.03(30.37-82.42) | 36.99(22.46) |
| ketosis | 9(100.0%) | 9 | 4.26(2.19-8.27) | 4.16(2.14) |
| Musculoskeletal and connective tissue disorders | neck mass | 12(54.5%) | 22 | 3.51(2.30-5.37) | 3.45(2.26) |
| Neoplasms benign, malignant and unspecified (incl cysts and polyps) | papillary thyroid cancer | 21(95.5%) | 22 | 7.45(4.85-11.44) | 7.12(4.64) |
| medullary thyroid cancer | 9(90.0%) | 10 | 14.86(7.74-28.53) | 13.51(7.04) |
| follicular thyroid cancer | 4(100.0%) | 4 | 13.82(4.94-38.62) | 12.65(4.53) |
| Nervous system disorders | hypoglycaemic unconsciousness | 12(100.0%) | 12 | 8.73(4.87-15.64) | 8.27(4.61) |
| wernicke's encephalopathy | 7(100.0%) | 7 | 6.67(3.12-14.24) | 6.41(3.00) |
| Psychiatric disorders | anorexia nervosa | 4(80.0%) | 5 | 10.31(4.16-25.58) | 9.66(3.90) |
| Reproductive system and breast disorders | polymenorrhoea | 9(52.9%) | 17 | 3.38(2.09-5.46) | 3.32(2.05) |

**Abbreviation**: SOC, system organ class; PT, preferred term; ROR, reporting odds ratio; CI, confidence interval; EBGM, empirical Bayesian geometric mean; EBGM05, the lower limit of 95% CI of EBGM.
